# Supplementary material
Source: PubMed Central journal article supplement (PMC4320675)
Supplement: NIHMS650265-supplement.pdf [file NIHMS650265-supplement.pdf]

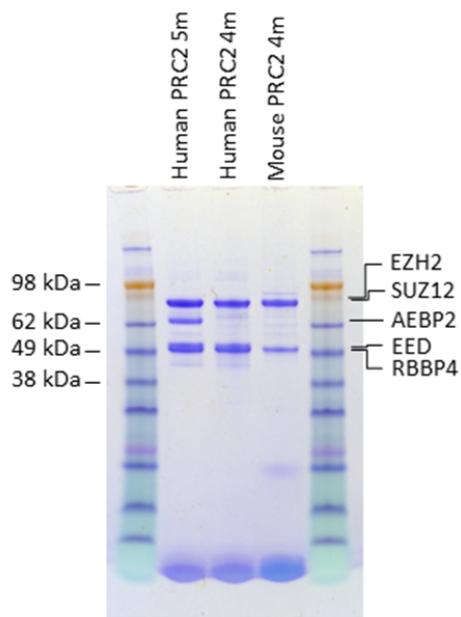

**Figure S1. Purity of human and mouse PRC2 complexes assessed by SDS-PAGE and Coomassie blue staining (related to Figures 1 and 2).** 8 pmol of each sample in 10 ul 1X LDS sample buffer was loaded on a NuPAGE® Novex 4-12% Bis-Tris gel and run 40 min at 150 V. Positions of the five PRC2 subunits on the gel are indicated.

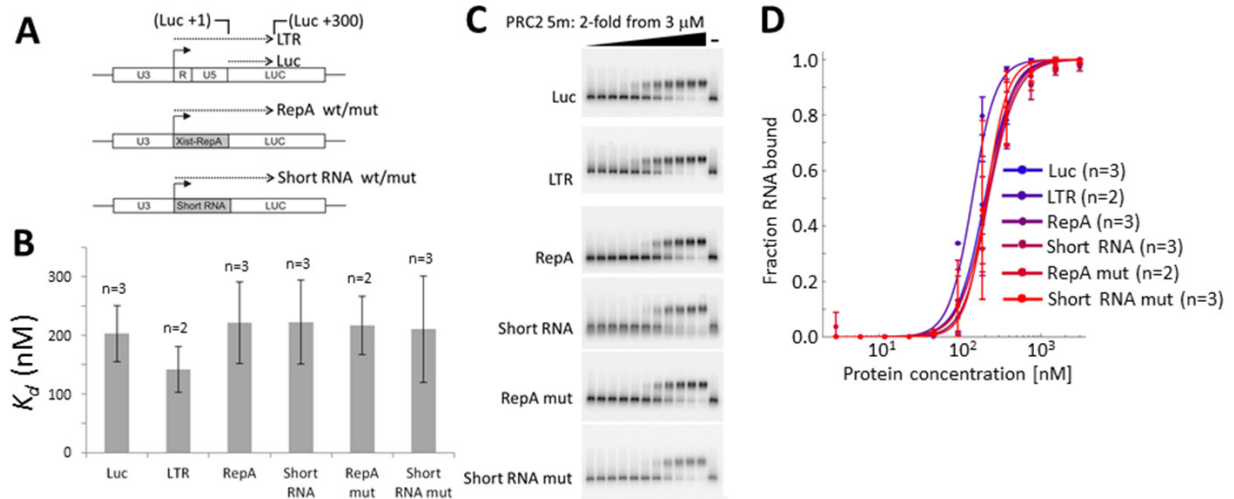

**Figure S2. PRC2 binds RNA in the presence or absence of the two-hairpin motif that is repeated within RepA RNA (related to Figure 3).** In vitro binding assays of recombinant PRC2 to in vitro transcribed RNAs generated from reporter vectors. (A) In vitro transcribed RNAs were generated from sequences of reporter vectors (Kanhere et al., 2010) to include both the insert and 300 bases from the 5' end of the luciferase reporter mRNA. (B) Dissociation constants were generated using EMSA of individual radiolabeled RNAs (<2 nM) in the presence of various concentration of human PRC2 5m. Error bars represent two to three independent experiments (n indicated), performed on different days. (C) Representative gels are presented. (D) Binding curves generated based on EMSA experiments in panel C and used to calculate dissociation constants ( $K_d$ 's) that are presented in panel C. Binding curves of PRC2 to in vitro transcribed RNAs generated from reporter vectors. Indicated are the numbers of independent experiments performed on different days.

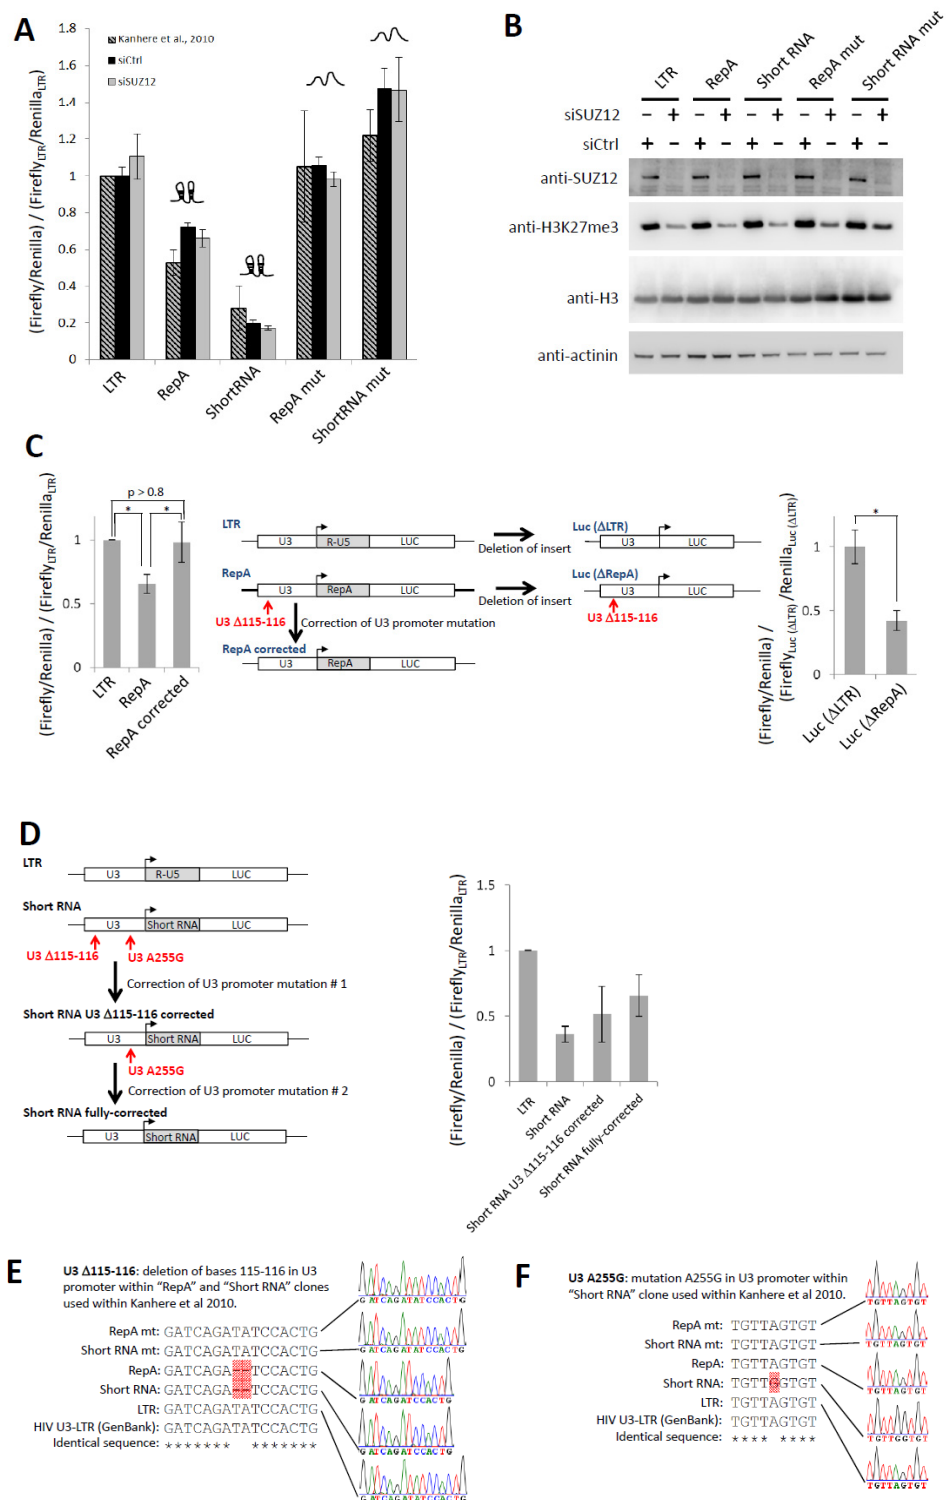

**Figure S3 (related to Figure 3). Effects of short hairpin RNAs on luciferase reporter expression are SUZ12-independent and can be tracked to promoter mutations in the reporter plasmid. (A)** Luciferase assays in the presence and absence of SUZ12 knockdown show that differences in expression level are PRC2-independent. Reporter vectors (Kanhere et al., 2010) were transfected into HEK293T/17 cells 48 h

post-transfection with siRNAs as indicated. Cells harvested 24 h later for luciferase reporter assay and (B) immunoblotting, to confirm siRNA knockdown of the essential PRC2 subunit SUZ12. (C) Reduced expression level of RepA reporter plasmid tracked to a mutation in an un-transcribed promoter region (see panel E for sequencing data). Left bar graph: Luciferase reporter assay performed before and after correcting a mutation that we identified in the U3 promoter of the RepA construct (U3  $\Delta$ 115-116). Right bar graph: Luciferase reporter assay performed after deletion of inserts from the LTR plasmid (Luc ( $\Delta$ LTR)) and RepA plasmid (Luc ( $\Delta$ RepA)), demonstrating that differences in expression levels between these reporters, as previously observed (Kanhere et al., 2010), are due to promoter mutation and independent of the non-coding RNA sequence that was originally inserted upstream of the luciferase open reading frame. Error bars represent standard deviations based on four independent biological replicates, performed on different days. Asterisks represent  $p < 0.05$  (paired Student's t-test, two tailed). (Kanhere et al., 2010). (D) Two mutations in U3 promoter that were identified within Short RNA plasmid (see panels E and F) were corrected sequentially. Luciferase reporter assay performed for each of the resulting plasmids showed partial restoration of expression after sequence correction. Error bars represents standard deviations based on three to four independent biological replicates, performed on different days. (E) Deletion of two bases ( $\Delta$ 115-116) within the U3 promoter, observed only in the vectors carrying wild-type two-hairpin motifs. These promoter mutations were not present in the vectors carrying the mutants designed to abolish the binding motif. (F) Mutation A255G within the U3 promoter region identified in the plasmid carrying the two-hairpin motif of the Short RNA, but not in any of the other reporters.

**Table S1. Primer sequences (related to Figures 1, 2 and 3)**

| <b>Name</b> | <b>Sequence</b>                                         | <b>Usage</b>                                                                                                                                                                            |
|-------------|---------------------------------------------------------|-----------------------------------------------------------------------------------------------------------------------------------------------------------------------------------------|
| P561        | TAATACGACTCACTATAGATGAGTATTCAACA<br>TTTCCGTGTCGCC       | T7-F primer to amplify template for transcription of b-lactamase 434 RNA from plasmid pUC57                                                                                             |
| P562        | CCTTCGGTCTCCGATCGTT                                     | R primer to amplify template for transcription of b-lactamase 434 RNA from plasmid pUC57                                                                                                |
| P553        | TAATACGACTCACTATAGACCAAACTGAAG<br>AAGGTAAACTGGTAATCTGG  | T7-F primer to amplify template for transcription of MBP 434 RNA, from plasmid pFB1.HMBP.hTERT.                                                                                         |
| P554        | TACTTTTCGCTTTTCAGTTCTTTATCCAGC                          | R primer to amplify template for transcription of MBP 434 RNA, from plasmid pFB1.HMBP.hTERT.                                                                                            |
| P555        | TAATACGACTCACTATAGATGTCCCCTATACT<br>AGGTTATTGGAAAATTAAG | T7-F primer to amplify template for transcription of GST 434 RNA, from plasmid pFB1.GST.hTERT.                                                                                          |
| P556        | CATTAAATATGTTTTATGACATAAACGATCTT<br>CGAAC               | R primer to amplify template for transcription of GST 434 RNA, from plasmid pFB1.GST.hTERT.                                                                                             |
| P559        | TAATACGACTCACTATAGGAAGACGCCAAAA<br>ACATAAAGAAAAGGCC     | T7-F primer to amplify template for transcription of Luciferase 434 RNA, from plasmid pDFT-temp16 (Firefly luciferase cDNA cloned in pUC57 vector).                                     |
| P560        | TGATTGGGAGCTTTTTTGCACGTTT                               | R primer to amplify template for transcription of Luciferase 434 RNA, from plasmid pDFT-temp16 (Firefly luciferase cDNA cloned in pUC57 vector).                                        |
| xw108       | GAAGAATCTGCTTAGGGTTAGG                                  | F primer used to sequence U3 promoter within reporter plasmids                                                                                                                          |
| xw110       | GTTCCATCTCCAGCGGATAG                                    | R primer used to sequence U3 promoter within reporter plasmids                                                                                                                          |
| xw273       | GGGCCAGGGATCAGATATCCACTGACCTTT                          | F primer used for PCR mutagenesis, to correct the mutation U3 $\Delta$ 115-116 in "RepA" and "Short RNA" reporter plasmids.                                                             |
| xw274       | ATCCAAAGGTCAGTGGATATCTGATCCCTG                          | R primer used for PCR mutagenesis, to correct the mutation U3 $\Delta$ 115-116 in "RepA" and "Short RNA" reporter plasmids.                                                             |
| xw253       | CAGCTGCTTTTTGCCTGTACTGGGATCCACCG<br>GTCGC               | F primer used for PCR mutagenesis, to delete the RNA motif that was originally inserted upstream of the luciferase open reading frame, within "RepA" and "Short RNA" reporter plasmids. |
| xw254       | GAAAAACGGACATGACCCTAGGTGGCCAGC<br>GGTGGTAC              | R primer used for PCR mutagenesis, to delete the RNA motif that was originally inserted upstream of the luciferase open reading frame, within "RepA" and "Short RNA" reporter plasmids. |
| xw275       | CGCGGAGAAAGAAGTGTTAGTGTGGAGGTT                          | F primer used for PCR mutagenesis, to correct the mutation U3 A255G in the "Short RNA" reporter plasmid.                                                                                |
| xw276       | TGCTGTCAAACCTCCACACTAACACTTCTT                          | R primer used for PCR mutagenesis, to correct the mutation U3 A255G in the "Short RNA" reporter plasmids.                                                                               |

## Supplemental References

Kanhere, A., Viiri, K., Araujo, C.C., Rasaiyaah, J., Bouwman, R.D., Whyte, W.A., Pereira, C.F., Brookes, E., Walker, K., Bell, G.W., *et al.* (2010). Short RNAs are transcribed from repressed polycomb target genes and interact with polycomb repressive complex-2. *Molecular cell* 38, 675-688.
